# Supplementary material for: Efficient and eco-friendly detection of gabapentin using nitrogen-doped carbon quantum dots: an analytical and green chemistry approach
Source: Royal Society of Chemistry journal article supplement (doi:10.1039/d3ra07365c), 2024-01-01
Supplement: d3ra07365c1.pdf [file d3ra07365c1.pdf]

## Efficient and Eco-friendly Detection of Gabapentin Using Nitrogen-doped Carbon Quantum Dots: An Analytical and Green Chemistry Approach

Atiah H. Almalki <sup>a,b</sup>, Ahmed H. Abdelazim <sup>c</sup>, Manal E. Alosaimi <sup>d</sup>, Maram H Abduljabbar <sup>e</sup>,  
Reem M. Alnemari <sup>f</sup>, Ahmed K. Bamaga <sup>g,h</sup>, Ahmed Serag <sup>c,\*</sup>

<sup>a</sup> Department of Pharmaceutical Chemistry, College of Pharmacy, Taif University, P.O. Box 11099, 21944, Taif, Saudi Arabia

<sup>b</sup> Addiction and Neuroscience Research Unit, Health Science Campus, Taif University, P.O. Box 11099, 21944, Taif, Saudi Arabia

<sup>c</sup> Pharmaceutical Analytical Chemistry Department, Faculty of Pharmacy, Al-Azhar University, 11751 Nasr City, Cairo, Egypt

<sup>d</sup> Department of Basic Health Sciences, College of Medicine, Princess Nourah bint Abdulrahman University, P.O. Box 84428, Riyadh 11671, Saudi Arabia

<sup>e</sup> Department of Pharmacology and Toxicology, College of Pharmacy, Taif University, Taif, 21944, Saudi Arabia

<sup>f</sup> Department of Pharmaceutics and Pharmaceutical Technology, College of Pharmacy, Taif University, P.O. Box 11099, Taif 21944, Saudi Arabia.

<sup>g</sup> Neuromuscular Medicine Unit, King Abdulaziz University Hospital, King Abdulaziz University, Jeddah, Saudi Arabia.

<sup>h</sup> Neurology Unit, Department of Pediatric, Faculty of Medicine, King Abdulaziz University, Jeddah, Saudi Arabia.

\*Corresponding author email address: (Ahmed Serag), [Ahmedserag777@hotmail.com](mailto:Ahmedserag777@hotmail.com),  
[Ahmedserag777@azhar.edu.eg](mailto:Ahmedserag777@azhar.edu.eg).

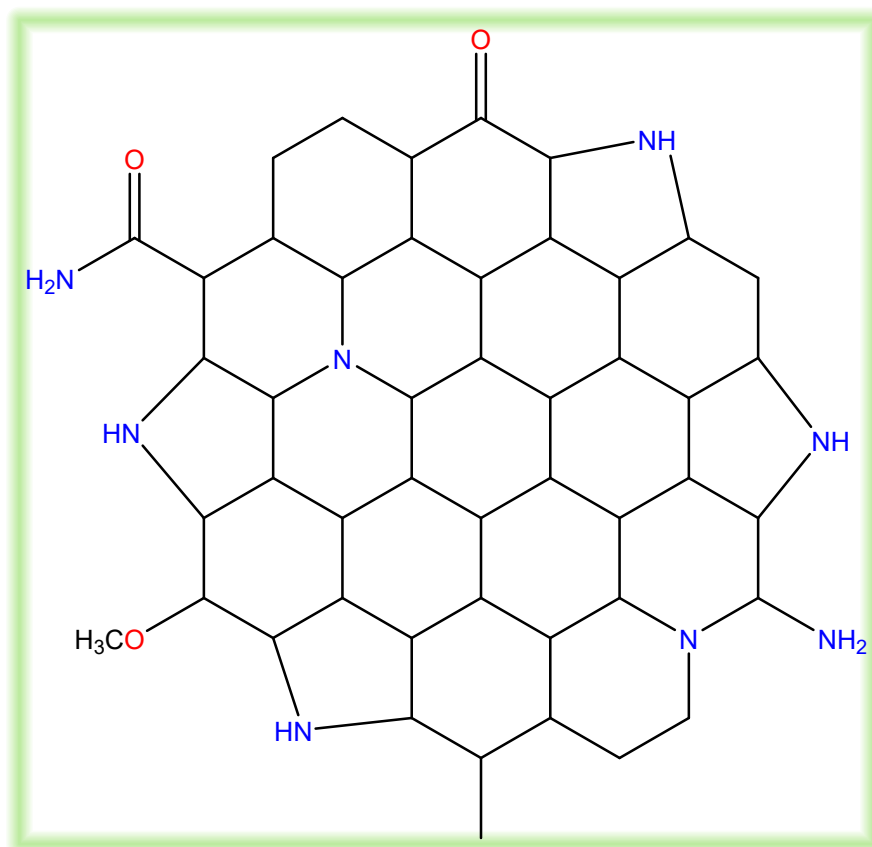

**Fig. S1:** Chemical structure of the green synthesized N-CQDs.

**Table S1:** Accuracy and precision of the proposed N-CQDs fluorescent probe for gabapentin detection.

| <i>Amount added</i><br>( $\mu\text{g/mL}$ ) | <i>Accuracy</i>                      |            | <i>Repeatability</i><br>( <i>Intra-day precision</i> ) |       | <i>Intermediate precision</i><br>( <i>Interday precision</i> ) |       |
|---------------------------------------------|--------------------------------------|------------|--------------------------------------------------------|-------|----------------------------------------------------------------|-------|
|                                             | Amount found<br>( $\mu\text{g/mL}$ ) | % Recovery | Amount found<br>( $\mu\text{g/mL}$ )                   | % RSD | Amount found<br>( $\mu\text{g/mL}$ )                           | % RSD |
| 2                                           | 1.998 $\pm$ 1.464                    | 99.92      | 1.987 $\pm$ 1.219                                      | 1.227 | 1.973 $\pm$ 1.800                                              | 1.825 |
| 4                                           | 4.003 $\pm$ 0.732                    | 100.07     | 3.981 $\pm$ 1.074                                      | 1.074 | 3.996 $\pm$ 1.658                                              | 1.660 |
| 6                                           | 5.984 $\pm$ 0.825                    | 99.74      | 5.947 $\pm$ 0.520                                      | 0.524 | 5.954 $\pm$ 1.567                                              | 1.579 |

**Table S2:** Experimental data for robustness testing of the proposed N-CQDs fluorescent probe for gabapentin detection.

| <i>Parameter</i>             | <i>Modification</i> | <i>% Recovery</i> |
|------------------------------|---------------------|-------------------|
| <i>Buffer (pH)</i>           | 7.75                | 100.25            |
|                              | 8 (optimum)         | 99.96             |
|                              | 8.25                | 98.63             |
| <i>Buffer volume (mL)</i>    | 1.4                 | 98.69             |
|                              | 1.5 (optimum)       | 100.25            |
|                              | 1.6                 | 101.23            |
| <i>Incubation time (min)</i> | 4                   | 99.25             |
|                              | 5 (optimum)         | 100.68            |
|                              | 6                   | 101.36            |

**Table S3:** Accuracy and precision of plasma samples for matrix effect using the proposed N-CQDs fluorescent probe for gabapentin detection.

|                                             | Plasma 1                             |                    |                     | Plasma 2                             |                    |                     | Plasma 3                             |                    |                     |
|---------------------------------------------|--------------------------------------|--------------------|---------------------|--------------------------------------|--------------------|---------------------|--------------------------------------|--------------------|---------------------|
| <i>Amount added</i><br>( $\mu\text{g/mL}$ ) | Amount found<br>( $\mu\text{g/mL}$ ) | Precision<br>(CV%) | Accuracy<br>(%Bias) | Amount found<br>( $\mu\text{g/mL}$ ) | Precision<br>(CV%) | Accuracy<br>(%Bias) | Amount found<br>( $\mu\text{g/mL}$ ) | Precision<br>(CV%) | Accuracy<br>(%Bias) |
| 1                                           | $1.10 \pm 0.091$                     | 8.25               | 10.15               | $1.06 \pm 0.111$                     | 10.54              | 5.60                | $1.12 \pm 0.127$                     | 11.32              | 12.02               |
| 6                                           | $6.10 \pm 0.399$                     | 6.55               | 9.80                | $6.09 \pm 0.495$                     | 8.12               | 9.42                | $6.13 \pm 0.484$                     | 7.89               | 13.12               |
